# Supplementary material for: Size-resolved chemical composition, effective density, and optical properties of biomass burning particles
Source: Copernicus journal article supplement (doi:10.5194/acp-2016-1060), 2016-12-07
Supplement: Supplementary file 1 [file acp-2016-1060-supplement.pdf]

## 1 **Supplementary Materials**

2

3

4 Table S1. Peak values and R squares of the average density distribution of 50, 100,  
5 200, and 400 nm particles at 20 °C (room temperature), 150 °C, and 300 °C.

|        | 50 nm    |          |       | 100 nm   |          |       | 200 nm   |          |        | 400 nm   |          |       |
|--------|----------|----------|-------|----------|----------|-------|----------|----------|--------|----------|----------|-------|
|        | $x_{c1}$ | $x_{c2}$ | $R^2$ | $x_{c1}$ | $x_{c2}$ | $R^2$ | $x_{c1}$ | $x_{c2}$ | $R^2$  | $x_{c1}$ | $x_{c2}$ | $R^2$ |
| 20°C   | 1.167    | \        | 0.980 | 0.933    | 1.454    | 0.979 | 0.939    | 1.519    | 0.9697 | 1.344    | 1.917    | 0.966 |
| 150 °C | 0.972    | 1.642    | 0.951 | 0.981    | 1.691    | 0.932 | 0.984    | 1.746    | 0.949  | 1.094    | 1.798    | 0.911 |
| 300 °C | 0.976    | 1.756    | 0.851 | 0.994    | 1.851    | 0.864 | 1.030    | 1.857    | 0.850  | 1.157    | 2.051    | 0.779 |

6

7

8

9

10

11

12

13

14

15

16

17

18

19

20

21

22

23

24

25

26

27

28

29

30

31

32

33

34

35

36

37

38

39

40 Table S2. Single scattering albedo (SSA) at wavelengths of 530 nm and 450 nm and  
41 Ångström absorption exponent (AAE) of total biomass burning particles at 20 °C  
42 (room temperature), 150 °C, and 300 °C.

| Temperature              | SSA    |        | AAE               |
|--------------------------|--------|--------|-------------------|
|                          | 450 nm | 530 nm |                   |
| Room temperature (20 °C) | 0.750  | 0.897  | $6.230 \pm 0.160$ |
| 150 °C                   | 0.533  | 0.723  | $5.047 \pm 0.246$ |
| 300 °C                   | 0.469  | 0.560  | $2.229 \pm 0.292$ |

43

44

45

46

47

48

49

50

51

52

53

54

55

56

57

58

59

60

61

62

63

64

65

66

67

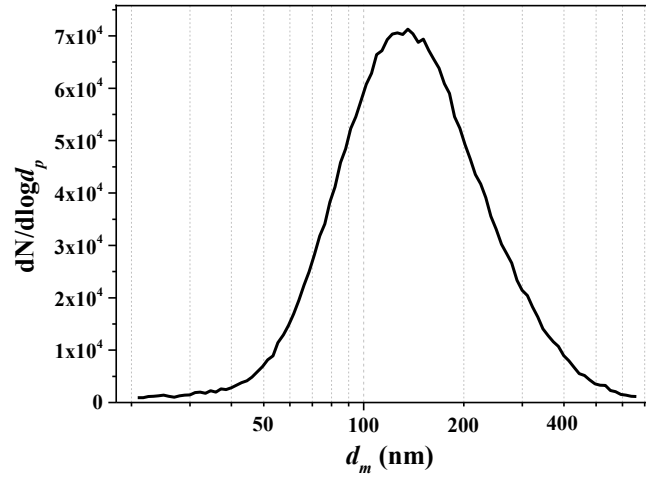

68

69 Figure S1. Average number size distribution of biomass burning particles.

70

71

72

73

74

75

76

77

78

79

80

81

82

83

84

85

86

87

88

89

90

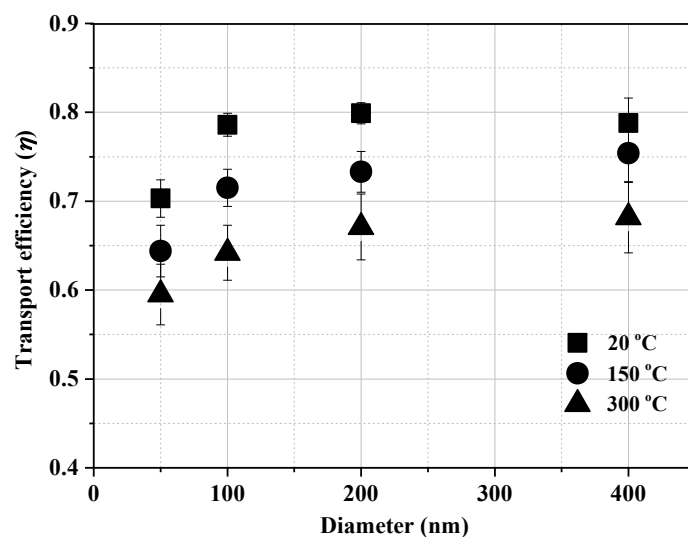

91  
92  
93  
94  
95  
96  
97  
98  
99  
100  
101  
102  
103  
104  
105  
106  
107  
108  
109  
110

Figure S2. Transport efficiency of NaCl in the thermodenuder as a function of particle diameter and heating temperature.

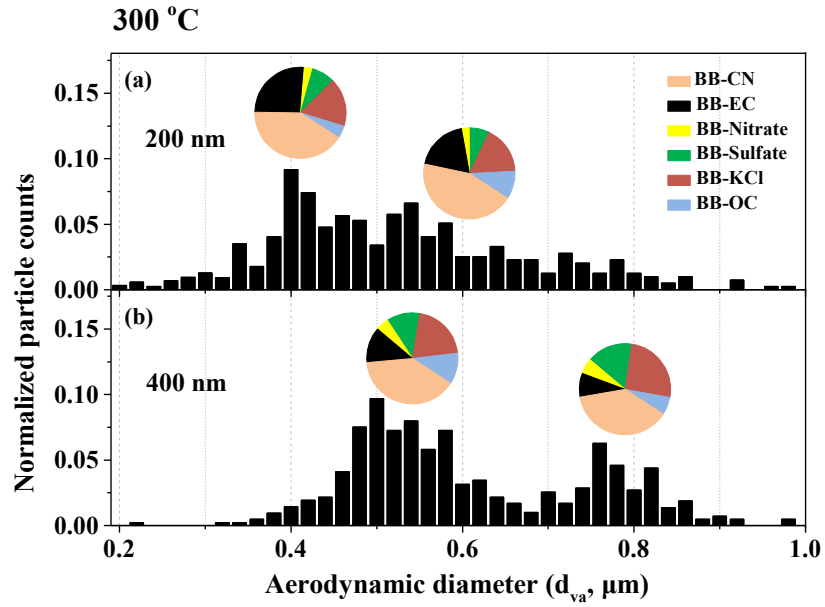

111

112 Figure S3. Vacuum aerodynamic size distributions detected by the SPAMS of 200 nm  
 113 and 400 nm electrical mobility size-selected biomass burning particles and pie charts  
 114 for the particle types in different aerodynamic modes at 300 °C.

115

116

117

118

119

120

121

122

123

124

125

126

127

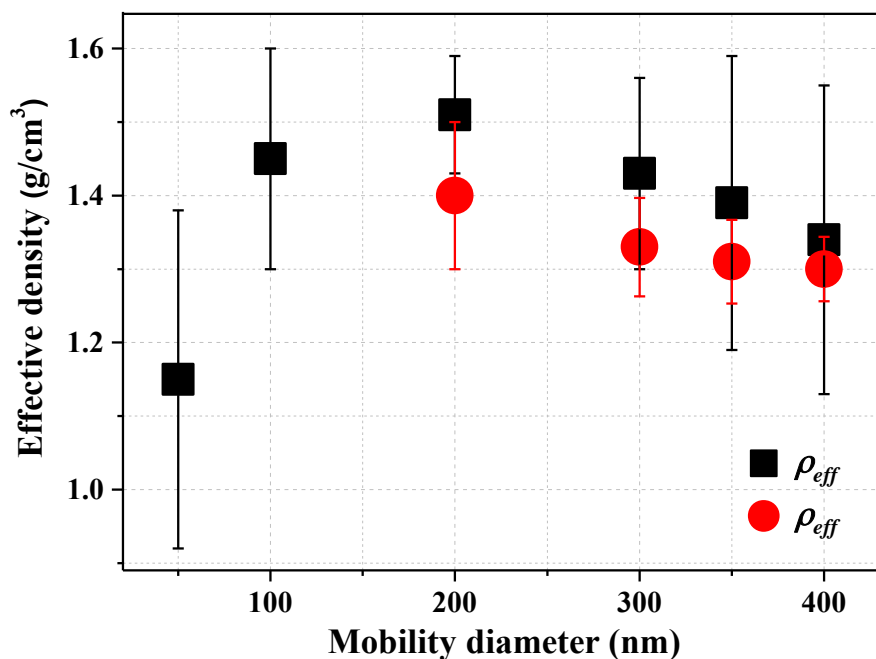

128

129 Figure S4. Size-resolved effective density of biomass burning particles determined by

130 two methods.  $\rho_{eff}^I$  is effective density from mobility and mass measurements (based

131 on the DMA-APM-CPC system) while  $\rho_{eff}^{II}$  is from mobility and aerodynamic

132 measurements (DMA-SPAMS system). The effective density of each size is the

133 average peak value of the dominant mode from different scans. Error bars represent

134 the standard deviations of the five replicate test results.

135

136

137

138

139

140

141

142

143

144

145

146

147

148

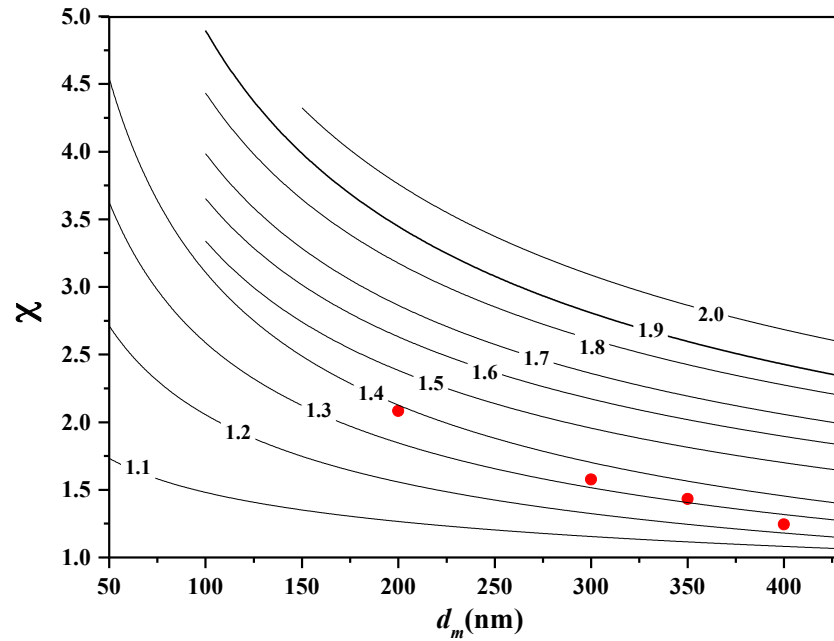

149

150 Figure S5. Contour plot of the ratio of the estimated particle mass ( $m_p$ ) to the exact  $m_p$ .

151 The estimated  $m_p$  was obtain by replacing  $\rho_{eff}^I$  with calculated  $\rho_{eff}^{II}$  in Equation (2).

152 The ratios of the estimated  $m_p$  by replacing  $\rho_{eff}^I$  with exact  $\rho_{eff}^{II}$  in Equation (2) to

153 the exact  $m_p$  was shown as well (red dots).

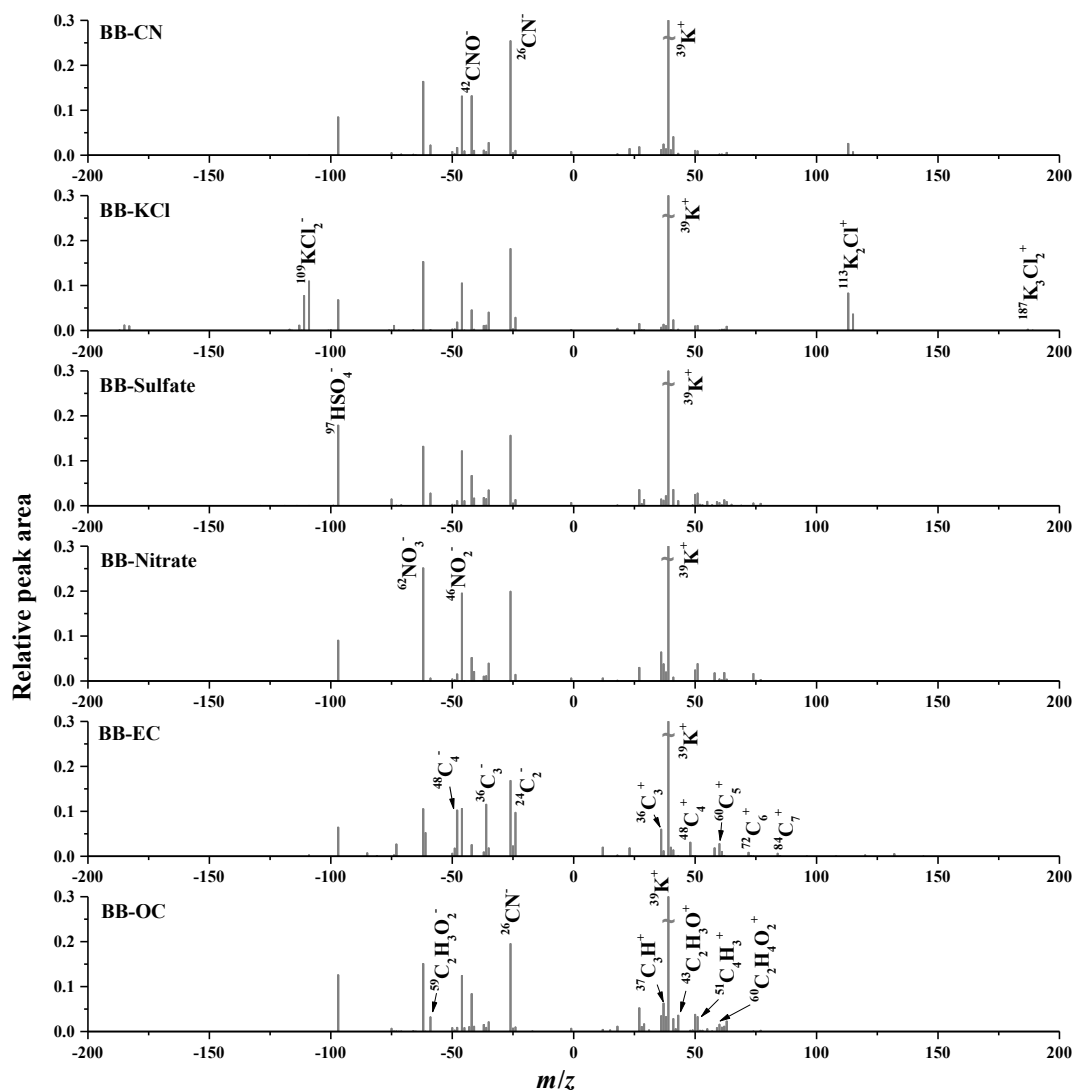

154

155 Figure S6. Average mass spectra of 6 particle types classified from biomass burning  
 156 particles.

157

158



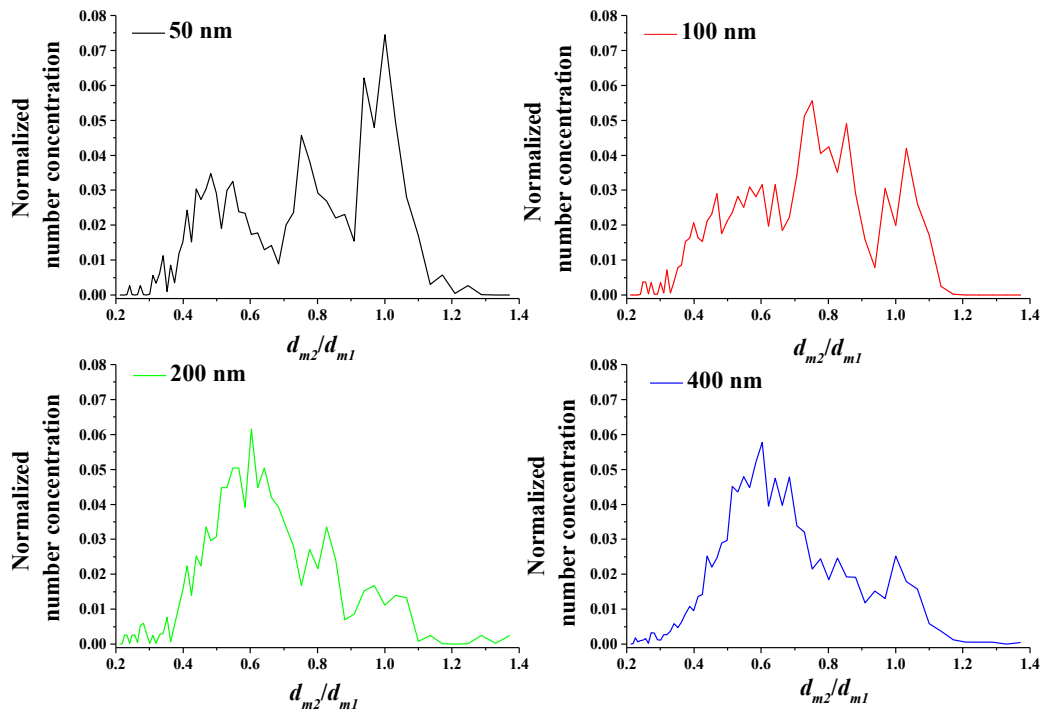

159  
 160  
 161  
 162  
 163  
 164  
 165  
 166  
 167  
 168  
 169  
 170  
 171  
 172  
 173  
 174  
 175  
 176  
 177  
 178  
 179  
 180  
 181  
 182  
 183  
 184  
 185

Figure S7. The size change ( $d_{m2}/d_{m1}$ ) for particles in the size range of 50-400 nm when heated at 300 °C.
